# Supplementary material for: A phylogenetically novel cyanobacterium most closely related to Gloeobacter
Source: PubMed Central journal article supplement (PMC7368068; doi:10.1038/s41396-020-0668-5), 2020-05-18

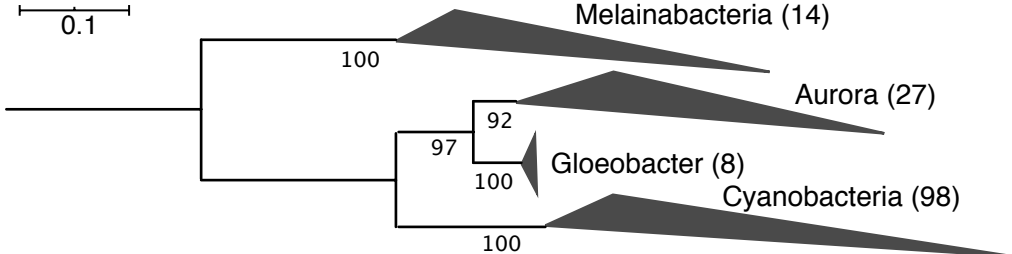

Supplement: 41396_2020_668_MOESM2_ESM.pdf [file 41396_2020_668_MOESM2_ESM.pdf]
